30 **HIGHLIGHTS**

- 31 • Varroa reproduction has been investigated in four different honey bee subspecies
- 32 • No differences could be observed, neither in drone nor in worker brood
- 33 • In managed bee populations, host immunity against *V. destructor* has not been
- 34 established

35

36 **GRAPHICAL ABSTRACT**

**CARNICA**

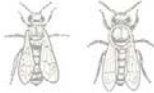

**MELLIFERA**

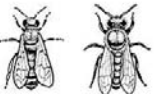

**LIGUSTICA**

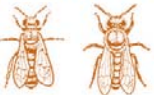

**GOTLAND/F2**

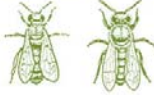

37

38 Illustrations after Gullan & Cranston 2014

39

40

41

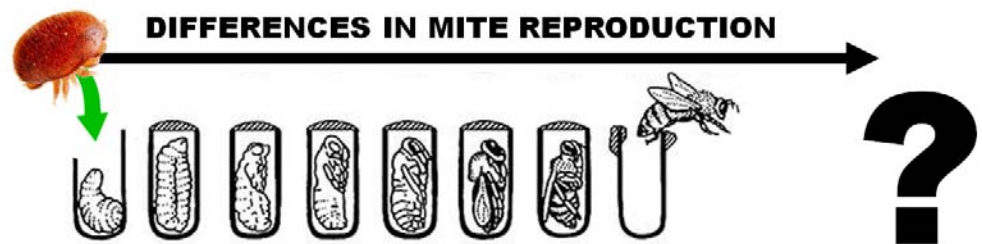

## 42 **1 INTRODUCTION**

43 Varroosis is known to be the most serious threat for European honey bees across the  
44 globe (Rosenkranz et al. 2010). A key for the mite's success lies in their ability to  
45 perfectly adapt to host conditions, including the reproduction in worker brood. Even  
46 though reproductive capacity of *V. destructor* seems equally high in both, drone and  
47 worker brood, a distinctive amount of mites fail to reproduce even though they are not  
48 infertile (de Ruiter 1987). The conditions however, under which mite foundresses  
49 remain "temporary sterile" cannot yet be explained (Garrido & Rosenkranz 2003) but is  
50 discussed to be a host-specific tolerance trait against the mite (Rosenkranz & Engels  
51 1994). Host stages in which mites are able to reproduce vary between drone and worker  
52 brood and reproduction is only possible within a narrow time frame, indicating a  
53 particularly sensitive process (Frey et al. 2013). Interestingly, Xie et al. (2016) revealed  
54 that mother mites are able to choose nurse bees over foragers and newly emerged bees  
55 as their optimal host in the phoretic phase, not only enabling them to quickly infest new  
56 brood cells (Donzé et al. 1998), but also providing the best possible nutritional  
57 conditions to produce a larger amount of progeny. Again, this demonstrates how highly  
58 adapted the parasite is.

59 Reports from surviving populations have increased over the last decade, suggesting a  
60 rapid host adaptation more or less simultaneously (Oddie et al. 2018). Besides a specific  
61 varroa mite targeted hygienic behavior (VSH = varroa sensitive hygiene) (Panziera et al.  
62 2017), reduced mite reproduction is considered to be one key advantage for colony  
63 survival by means of natural selection (Locke et al. 2012). Almost exclusively, such  
64 traits have been investigated and documented for resistant honey bee populations  
65 (Locke 2016a) but have probably been neglected for more common subspecies. To  
66 close this knowledge gap and ascertain both, fertility and fecundity as a consequence of  
67 the reproductive capacity of *V. destructor*, we have compared the three most common  
68 subspecies of the European honey bee (*Carnica*, *Mellifera*, *Ligustica*) and the F2  
69 generation of a varroa surviving population descending from the "Bond Project" on  
70 Gotland (Fries et al. 2006), to identify if managed host populations possibly have  
71 adapted over time already despite systematic control measures.

72

## 73 2 MATERIALS & METHODS

### 74 *Bee colonies and subspecies*

75 A total of 22 honey bee colonies (*Apis mellifera* L.) were investigated during summer  
76 season from May to August. We focused on subspecies originating in Europe such as  
77 the Carniolan bee *A. m. carnica* (n=5), the European dark bee *A. m. mellifera* (n=7), the  
78 Italian bee *A. m. ligustica* (n=5) and a F2 generation of mite surviving bees from the  
79 “Bond Project” descending from the Swedish island of Gotland “Gotland/F2” (n=5). To  
80 provide a sufficient amount of drone pupa, one to two drone-frames were placed at the  
81 edge of the brood nest of each colony. All experimental hives were kept and maintained  
82 at our local apiary near the Apicultural State Institute in Stuttgart, Germany.

### 83 *Mite reproduction*

84 The reproductive capacity of the foundress mite is specified as success to generate at  
85 least one viable daughter before the host pupa hatches (fertility). In contrast, mother  
86 mites that lay no or only a single egg, have no males or are delayed in egg-laying  
87 respective to host-development will fail to produce viable offspring for the following  
88 mite generations. Further, the number of progeny per mite (fecundity) serves as measure  
89 for a possible host adaptation representing a reduced reproductive capacity in terms of  
90 an increased survivability of the colony.

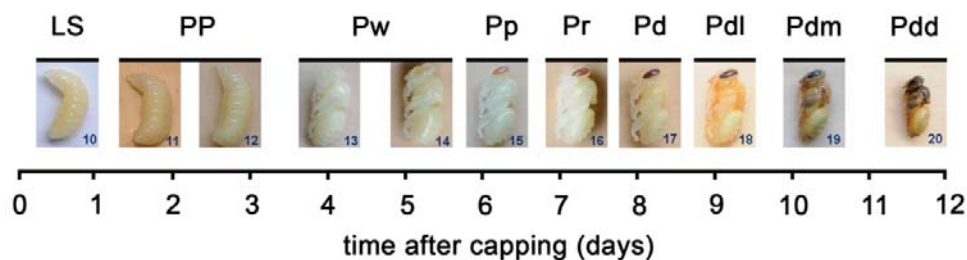

92 **[Fig. 1** Classification of pupal stages respective to ontogenetic worker development (after Rembold et al.  
93 1980, graphically modified after Wang et al. 2015). Abbreviations: LS = 5<sup>th</sup> larval instar after sealing; PP  
94 = prepupa; P = pupa (w = white eyes; p = pink eyes; r = red eyes; d = dark brown eyes; dl = dark brown  
95 eyes, light pigmented thorax; dm = dark brown eyes, medium colored thorax; dd = dark brown eyes, dark  
96 thorax).

97 To increase comparability of our results, all experiments were performed according to  
98 the methods described in Locke & Fries (2011). In brief, worker and drone pupae in  
99 stage Pd and older, but before eclosion, were examined (see Fig. 1). At least 30 cells per  
100 colony were carefully investigated where possible and mite infestation was documented.  
101 Only cells with a single foundress were considered, cell content and mites attached to  
102 the pupa were accurately removed and subsequently observed under a stereo-  
103 microscope (Zeiss Stemi 2000-CS).

#### 104 *Data evaluation*

105 Mite reproduction and fecundity data were first tested for variance homogeneity and  
106 normal distribution with Levene's and Shapiro-Wilk test and verified for both datasets,  
107 respectively. A generalized linear model was applied to both sets followed by a  
108 comparison of the least-squares means and a  $P$  value adjustment (tukey method). For all  
109 tests RStudio (R Core Team, 2018) and significance level of  $\alpha=0.05$  was used.

110

### 111 **3 RESULTS**

112 Different parameters of varroa mite reproduction in four different honey bee subspecies  
113 are presented in Table 1. A total of  $n = 3104$  drone and  $n = 2526$  worker brood cells  
114 were evaluated. We did not find significant differences for the overall reproductive  
115 capacity (fertility) in the four groups. Neither in worker brood ( $df = 10$ :  $F = 2.26$ ;  $P =$   
116  $0.144$ ) nor in drone brood ( $df = 15$ :  $F = 2.51$ ;  $P = 0.098$ ). A similar outcome was  
117 observed for the average number of offspring per foundress (fecundity). Both, progeny  
118 found in worker brood ( $df = 10$ :  $F = 2.84$ ;  $P = 0.092$ ) and in drone brood ( $df = 10$ :  $F =$   
119  $2.32$ ;  $P = 0.873$ ) were at the same level.

120 Due to an increased infestation rate which resulted in a high ratio of multiply infested  
121 cells in the drone brood of all four subspecies, it was not possible to evaluate drone  
122 pupa in stage Pd and older as previously described. To compare fecundity regardless  
123 these circumstances, we had to consider earlier developmental stages beginning already  
124 at Pw (Fig. 1) providing a sufficient amount of singly infested cells. This is why the  
125 average number of offspring is relatively low when compared to worker brood.

126 For the number of cells in *Ligustica* drone brood it needs to be mentioned that due to the  
127 late re-queening of experimental colonies (mid July) it was not possible to obtain a  
128 sufficient amount of singly infested cells. Hence, we only used 10 cells per colony on  
129 average, this should be considered when interpreting the results.

130 **[Tab. 1** Comparison of the reproductive capacity (fertility and fecundity) of mother mites produced in  
131 singly infested drone and worker brood cells]

|                                    | <b>Carnica</b>   | <b>Mellifera</b> | <b>Ligustica</b> | <b>Gotland/F2</b> |           |
|------------------------------------|------------------|------------------|------------------|-------------------|-----------|
| <b>Drones</b>                      |                  |                  |                  |                   |           |
| No. of cells (n)                   | 68               | 179              | 51 <sup>b</sup>  | 141               |           |
| Fertility                          | 79%              | 83%              | 59%              | 79%               | <i>ns</i> |
| Fecundity ( $\pm$ SE) <sup>a</sup> | 2.7 ( $\pm$ 0.5) | 2.7 ( $\pm$ 0.3) | 2.2 ( $\pm$ 0.6) | 2.6 ( $\pm$ 0.2)  | <i>ns</i> |
| <b>Workers</b>                     |                  |                  |                  |                   |           |
| No. of cells (n)                   | 90               | 91               | 120              | 120               |           |
| Fertility                          | 82%              | 89%              | 96%              | 78%               | <i>ns</i> |
| Fecundity ( $\pm$ SE)              | 3.3 ( $\pm$ 0.3) | 3.4 ( $\pm$ 0.3) | 4.1 ( $\pm$ 0.4) | 3.3 ( $\pm$ 0.2)  | <i>ns</i> |

a: earlier developmental stages beginning already at Pw had to be considered for the drone brood

b: not representative, due to the low amount of singly infested cells (10 cells per colony on average)

132 ns: not significant ( $P > 0.05$ )

133

134

135 **4 DISCUSSION**

136 Here, we studied the reproductive capacity of three commonly managed honey bee  
137 subspecies and the F2 generation of a varroa surviving population originated from the  
138 “Bond Project” (Fries et al. 2006). When compared to former data, the fertility of varroa  
139 foundresses in worker brood did not change significantly during the past three decades  
140 and has levelled off between 80 to 90 % (Thrybom & Fries 1991; Corrêa-Marques et al.  
141 2003; Alattal et al. 2006; Locke et al. 2012; Alattal et al. 2017). This trend is  
142 corroborated by our data and most likely similar for drone brood.

143 Drone frames that we have investigated here were highly infested already in early  
144 summer, not least because some colonies remained untreated in the former season at our  
145 experimental apiary but also because the mite’s preference to infest drone cells is  
146 approximately eight times higher when compared to worker brood (Fuchs 1990;  
147 Santillán-Galicia et al. 2012). In addition, the time frame which is attractive to enter  
148 cells for infestation is approximately twice as long in drone brood (Calderone et al.  
149 2002), being one reason for this preference. Under these circumstances it was not  
150 surprising that we found many multiply infested drone cells and it became a challenge  
151 to locate cells containing only one foundress for our evaluation. Ligustica queens  
152 arrived after summer solstice very late in the season and besides that, a very high mite  
153 infestation in drones was the reason that we were not able to collect a sufficient amount  
154 of singly infested cells.

155 Moreover, our data confirms that there is no large selection pressure favoring reduced  
156 mite reproduction in both, drones and workers, at least not under intensively managed  
157 conditions. For the three common subspecies this is not remarkable as host adaptations  
158 are most often reported as a means of natural selection (Seeley 2007; Locke et al. 2012;  
159 Oddie et al. 2017). For the F2 generation of the surviving population from Gotland  
160 however, we had expected a different outcome. The Gotland bees have developed an  
161 apparent reduced mite reproductive success trait that is either inheritable from paternal,  
162 maternal or both sides in the F1 generation (Locke 2016b). Our results provide evidence  
163 that this trait seems to fade out by further generational change, once more making the  
164 colonies susceptible to *Varroosis*.

165 Although we did not find significant differences in the fertility and fecundity of varroa  
166 females between surviving F2 and common honey bee subspecies, we are still  
167 convinced that the varroa reproductive capacity represents a crucial and probably the  
168 only parameter for the future selection of varroa resistance on the individual level. One  
169 reason is that we confirmed that about 85 % of the “temporary sterile mites” were again  
170 fertile if re-introduced into freshly sealed brood cells (Weller 2008). Hence, the  
171 occurrence of “temporary sterile mites” seems to be rather a trait of the host than a trait  
172 of the parasite and, therefore, offers possibilities for selection.

173

## 174 **5 CONCLUSION**

175 Frequent reports have shown that apart from the most common managed honey bee  
176 subspecies there are populations demonstrating increased mite susceptibility and great  
177 variance in mite reproductive capacity (de Guzman et al. 2008; Locke 2016a; Nganso et  
178 al. 2018). This reflects an encouraging potential to establish varroa resistance in  
179 European *A. mellifera* populations (Büchler et al. 2010). However, resistance  
180 mechanisms are complex which is why further research is necessary to understand host-  
181 adaptation and mite reproduction in greater detail.

182



183           **REFERENCES**

- 184 Alattal Y, Rosenkranz P, Zebitz CPW (2006) Reproduction of *Varroa destructor* in  
185 sealed worker bee brood cells of *Apis mellifera carnica* and *Apis mellifera syriaca* in  
186 Jordan. *Mitt Dtsch Ges Allg Angew Ent* 315–320.
- 187 Alattal Y, AlGhamdi A, Single A, Ansari MJ, Alkathiri H (2017) Fertility and  
188 reproductive rate of *Varroa* mite, *Varroa destructor*, in native and exotic honeybee, *Apis*  
189 *mellifera* L., colonies under Saudi Arabia conditions. *Saudi J Biol Sci* 24:992–995. doi:  
190 10.1016/j.sjbs.2016.12.018
- 191 Büchler R, Berg S, Le Conte Y (2010) Breeding for resistance to *Varroa destructor* in  
192 Europe. *Apidologie* 41:393–408. doi: 10.1051/apido/2010011
- 193 Corrêa-Marques MH, Medina LM, Martin SJ, De Jong D (2003) Comparing data on the  
194 reproduction of *Varroa destructor*. *Genet Mol Res* 2:1–6.
- 195 de Guzman LI, Rinderer TE, Frake AM (2008) Comparative reproduction of *Varroa*  
196 *destructor* in different types of Russian and Italian honey bee combs. *Exp Appl Acarol*  
197 44:227–38. doi: 10.1007/s10493-008-9142-1
- 198 de Ruijter A (1987) REPRODUCTION OF *VARROA JACOBSONI* DURING  
199 SUCCESSIVE BROOD CYCLES OF THE HONEYBEE. *Apidologie* 18:321–326. doi:  
200 10.1051/apido:19870403
- 201 Donzé, G., Fluri, P., & Imdorf, A. (1998). Hochorganisierte Leben auf kleinem Raum:  
202 Die Fortpflanzung der *Varroa*-Milben in den verdeckelten Brutzellen der Bienenvölker.  
203 Schweizerische Bienen-Zeitung (121), S. 26-33.
- 204 Fries I, Imdorf A, Rosenkranz P (2006) Survival of mite infested (*Varroa destructor*)  
205 honey bee (*Apis mellifera*) colonies in a Nordic climate. *Apidologie* 37:564–570. doi:  
206 10.1051/apido
- 207 Fuchs S (1990) Preference for drone brood cells by *Varroa jacobsoni* Oud in colonies of  
208 *Apis mellifera carnica*. *Apidologie* 21:193–199. doi: 10.1051/apido:19900304

- 209 Garrido C, Rosenkranz P (2003) The reproductive program of female *Varroa destructor*  
210 mites is triggered by its host, *Apis mellifera*. *Exp Appl Acarol* 31:269–273. doi:  
211 10.1023/B:APPA.0000010386.10686.9f
- 212 Gullan P.J., Cranston P.S. (2014) *The Insects: An Outline of Entomology, Fifth Edition*,  
213 John Wiley & Sons Blackwell, Oxford ISBN: 1-4051-1113-5
- 214 Locke B (2016a) Natural *Varroa* mite-surviving *Apis mellifera* honeybee populations.  
215 *Apidologie* 47:467–482. doi: 10.1007/s13592-015-0412-8
- 216 Locke B (2016b) Inheritance of reduced *Varroa* mite reproductive success in reciprocal  
217 crosses of mite-resistant and mite-susceptible honey bees (*Apis mellifera*). *Apidologie*  
218 47:583–588. doi: 10.1007/s13592-015-0403-9
- 219 Locke B, Fries I (2011) Characteristics of honey bee colonies (*Apis mellifera*) in  
220 Sweden surviving *Varroa destructor* infestation. *Apidologie* 42:533–542. doi:  
221 10.1007/s13592-011-0029-5
- 222 Locke B, Le Conte Y, Crauser D, Fries I (2012) Host adaptations reduce the  
223 reproductive success of *varroa destructor* in two distinct european honey bee  
224 populations. *Ecol Evol* 2:1144–1150. doi: 10.1002/ece3.248
- 225 Nganso BT, Fombong AT, Yusuf AA, Pirk CWW, Stuhl C, Torto B (2018) Low  
226 fertility, fecundity and numbers of mated female offspring explain the lower  
227 reproductive success of the parasitic mite *Varroa destructor* in African honeybees.  
228 *Parasitology* 1–7. doi: 10.1017/S0031182018000616
- 229 Oddie M, Dahle B, Neumann P (2017) Norwegian honey bees surviving *Varroa*  
230 *destructor* mite infestations by means of natural selection. *PeerJ* 5:e3956. doi:  
231 10.7717/peerj.3956
- 232 Oddie M, Büchler R, Dahle B, Kovacic M, Le Conte Y, Locke B, de Miranda JR,  
233 Mondet F, Neumann P (2018) Rapid parallel evolution overcomes global honey bee  
234 parasite. *Sci Rep* 8:7704. doi: 10.1038/s41598-018-26001-7

- 235 Panziera D, van Langevelde F, Blacquièrre T (2017) Varroa sensitive hygiene  
236 contributes to naturally selected varroa resistance in honey bees. *J Apic Res* 56:635–  
237 642. doi: 10.1080/00218839.2017.1351860
- 238 R Core Team (2018) R: A language and environment for statistical computing. R  
239 Foundation for Statistical Computing, Vienna, Austria.
- 240 Rembold H, Kremer J-P, Ulrich GM (1980) Characterization of Postembryonic  
241 Developmental Stages of the Female Castes of the Honey Bee, *Apis mellifera* L.  
242 *Apidologie* 11:29–38. doi: 10.1051/apido:19800104
- 243 Rosenkranz P, Aumeier P, Ziegelmann B (2010) Biology and control of Varroa  
244 destructor. *J Invertebr Pathol* 103 Suppl:S96-119. doi: 10.1016/j.jip.2009.07.016
- 245 Rosenkranz P, Engels W (1994) Infertility of Varroa jacobsoni females after invasion  
246 into *Apis mellifera* worker brood as a tolerance factor against varroatosis.
- 247 Santillán-Galicia, M., Otero-Colina, G., Romero-Vera, C., & Cibrián-Tovar, J. (2002).  
248 Varroa destructor (Acari: Varroidae) infestation in queen, worker, and drone brood of  
249 *Apis mellifera* (Hymenoptera: Apidae). *The Canadian Entomologist*, 134(3), 381-390.  
250 doi:10.4039/Ent134381-3
- 251 Thrybom B & Fries I (1991) Development of infestations by Varroa jacobsoni in hybrid  
252 colonies of *Apis mellifera monticola* and *Apis mellifera ligustica*, *Journal of Apicultural*  
253 *Research*, 30:3-4, 151-155, DOI: 10.1080/00218839.1991.11101250
- 254 Wang Y, Ma L-T, Xu B-H (2015) Diversity in life history of queen and worker honey  
255 bees, *Apis mellifera* L. *J Asia Pac Entomol* 18:145–149. doi:  
256 10.1016/j.aspen.2014.11.005
- 257 Weller, S. (2008). Populationsdynamik der parasitischen Bienenmilbe Varroa destructor  
258 in vorselektierten Bienenvölkern (*A. mellifera* L.) unter besonderer Berücksichtigung  
259 der Reproduktion. Diploma Thesis, Apicultural State Institute, Stuttgart-Hohenheim
- 260 Xie X, Huang ZY, Zeng Z (2016) Why do Varroa mites prefer nurse bees? *Sci Rep*  
261 6:28228. doi: 10.1038/srep28228
- 262
